# Supplementary material for: Patient-derived models recapitulate heterogeneity of molecular signatures and drug response in pediatric high-grade glioma
Source: PubMed Central journal article supplement (PMC8253809; doi:10.1038/s41467-021-24168-8), 2021-07-02
Supplement: 41467_2021_24168_MOESM1_ESM.pdf [file 41467_2021_24168_MOESM1_ESM.pdf]

## Supplementary Information:

### Patient-Derived Models Recapitulate Heterogeneity of Molecular Signatures and Drug Response in Pediatric High-Grade Glioma

Chen He\*<sup>1</sup>, Ke Xu\*<sup>2,3</sup>, Xiaoyan Zhu\*<sup>1</sup>, Paige S. Dunphy\*<sup>1,4</sup>, Brian Gudenas<sup>1</sup>, Wenwei Lin<sup>5</sup>, Nathaniel Twarog<sup>5</sup>, Laura D. Hover<sup>1</sup>, Chang-Hyuk Kwon<sup>1</sup>, Lawryn H. Kasper<sup>1</sup>, Junyuan Zhang<sup>1</sup>, Xiaoyu Li<sup>6</sup>, James Dalton<sup>6</sup>, Barbara Jonchere<sup>7</sup>, Kimberly S. Mercer<sup>7</sup>, Duane G. Currier<sup>5</sup>, William Caufield<sup>8</sup>, Yingzhe Wang<sup>8</sup>, Jia Xie<sup>5</sup>, Alberto Broniscer<sup>9</sup>, Cynthia Wetmore<sup>10</sup>, Santhosh A. Upadhyaya<sup>4</sup>, Ibrahim Qaddoumi<sup>4</sup>, Paul Klimo<sup>11</sup>, Frederick Boop<sup>11</sup>, Amar Gajjar<sup>4</sup>, Jinghui Zhang<sup>3</sup>, Brent A. Orr<sup>6</sup>, Giles W. Robinson<sup>4</sup>, Michelle Monje<sup>12</sup>, Burgess B. Freeman<sup>8</sup>, Martine F. Roussel<sup>7</sup>, Paul A. Northcott<sup>1</sup>, Taosheng Chen<sup>5</sup>, Zoran Rankovic<sup>5</sup>, Gang Wu<sup>2,3</sup>, Jason Chiang<sup>6#</sup>, Christopher L. Tinkle<sup>13#</sup>, Anang A. Shelat<sup>5#</sup>, and Suzanne J. Baker<sup>1#</sup>

Departments of <sup>1</sup> Developmental Neurobiology, <sup>2</sup> Center for Applied Bioinformatics, <sup>3</sup>Computational Biology, <sup>4</sup> Oncology, <sup>5</sup> Chemical Biology and Therapeutics, <sup>6</sup> Pathology, <sup>7</sup> Tumor Cell Biology, <sup>8</sup> Preclinical Pharmacokinetics Shared Resource St. Jude Children's Research Hospital, Memphis TN. 38105

<sup>9</sup> Division of Hematology-Oncology, Children's Hospital of Pittsburgh, Pittsburgh, PA

<sup>10</sup> Exelixis, Alameda, CA

<sup>11</sup> Department of Surgery, St. Jude Children's Research Hospital, Memphis TN. 38105

<sup>12</sup> Department of Neurology, Stanford University, Stanford, CA

<sup>13</sup> Department of Radiation Oncology, St. Jude Children's Research Hospital, Memphis TN. 38105

\*Shared first authors contributed equally

#Shared corresponding authors

Suzanne.Baker@StJude.org

[Anang.Shelat@StJude.org](mailto:Anang.Shelat@StJude.org)

[Christopher.Tinkle@StJude.org](mailto:Christopher.Tinkle@StJude.org)

[Jason.Chiang@StJude.org](mailto:Jason.Chiang@StJude.org)

**Supplementary Figure 1: Heatmap of large-scale copy number changes in patient tumors, PDOX, and cell lines.** Patient tumor and matched PDOX and cell lines are grouped together in columns. Abbreviated line numbers are listed across the top. Rows show large scale gain (red) or loss (blue) of chromosome arms indicated at right. Scored large-scale copy number changes encompassed more than 50% of a chromosome arm.

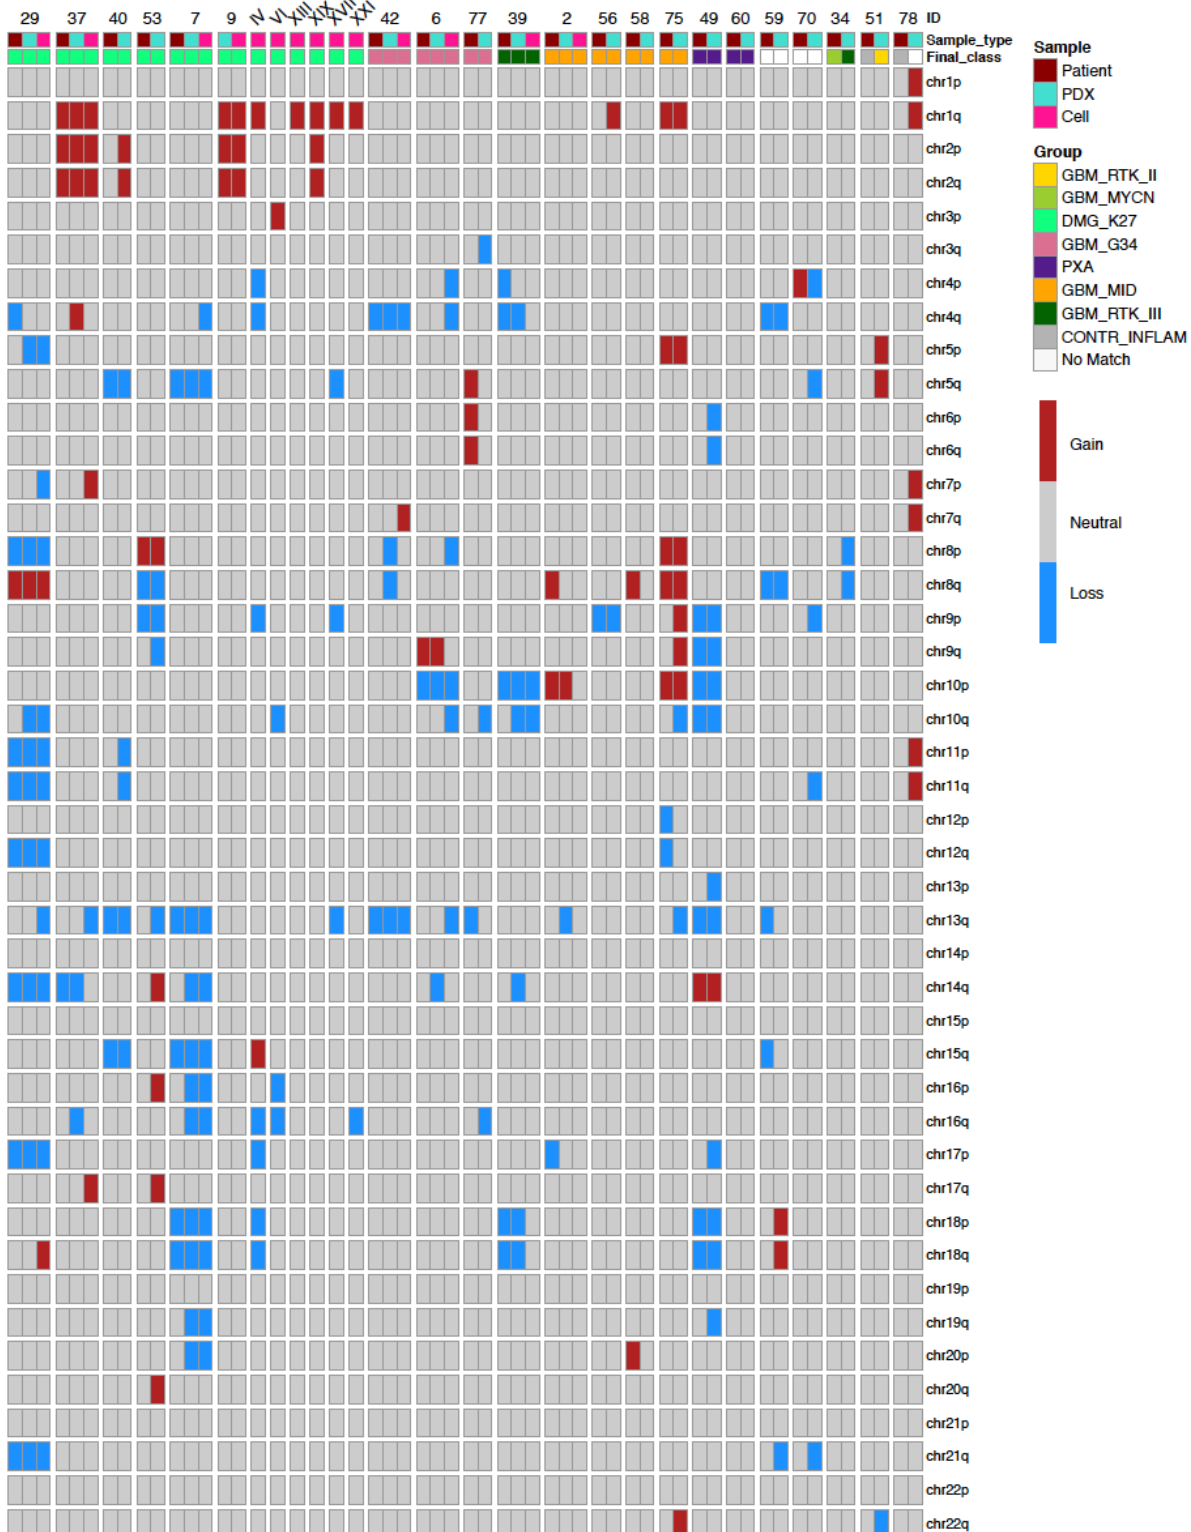

**Supplementary Figure 2: Extra-chromosomal DNA amplifications in PDOX models.** (a) WGS (top 3 tracks) and RNA-seq (lower 3 tracks) showed amplification and overexpression, respectively, of a TMEM165-PDGFR $\alpha$  fusion gene in SJ-HGGX75 patient tumor and matched PDOX compared to normal copy number and expression in SJ-HGGX70. The structural variant connecting the boundaries of the amplified segment was identified in WGS of SJ-HGGX75 patient tumor and matched PDOX. (b) TMEM165-PDGFR $\alpha$  fusion gene was identified from RNA-seq data using CICERO in SJ-HGGX75 patient tumor and matched PDOX. The resulting chimeric protein replaces the most N-terminal Ig-like domains of PDGFR $\alpha$  with 70 amino acids from the N-terminus of TMEM165. (c) Interphase fluorescence *in situ* hybridization of PDOX SJ-HGGX75 shows amplification of PDGFR $\alpha$  (red, 4q12; control, green, 4p12) in the form of double minutes in 100% of the 200 evaluable nuclei. (d) WGS (top 3 tracks) and RNA-seq (lower 2 tracks) showed MYCN amplification and overexpression, respectively, in the PDOX from SJ-DMGX40, but not the diagnostic tumor from which it was derived, or autopsy from the same patient. (e) Interphase fluorescence *in situ* hybridization of PDOX SJ-DMGX40 shows amplification of MYCN (red, 2p24; control, green, 2q35) in the form of double minutes in 100% of the 200 evaluable nuclei. Scale bar in c,e: 15  $\mu$ m

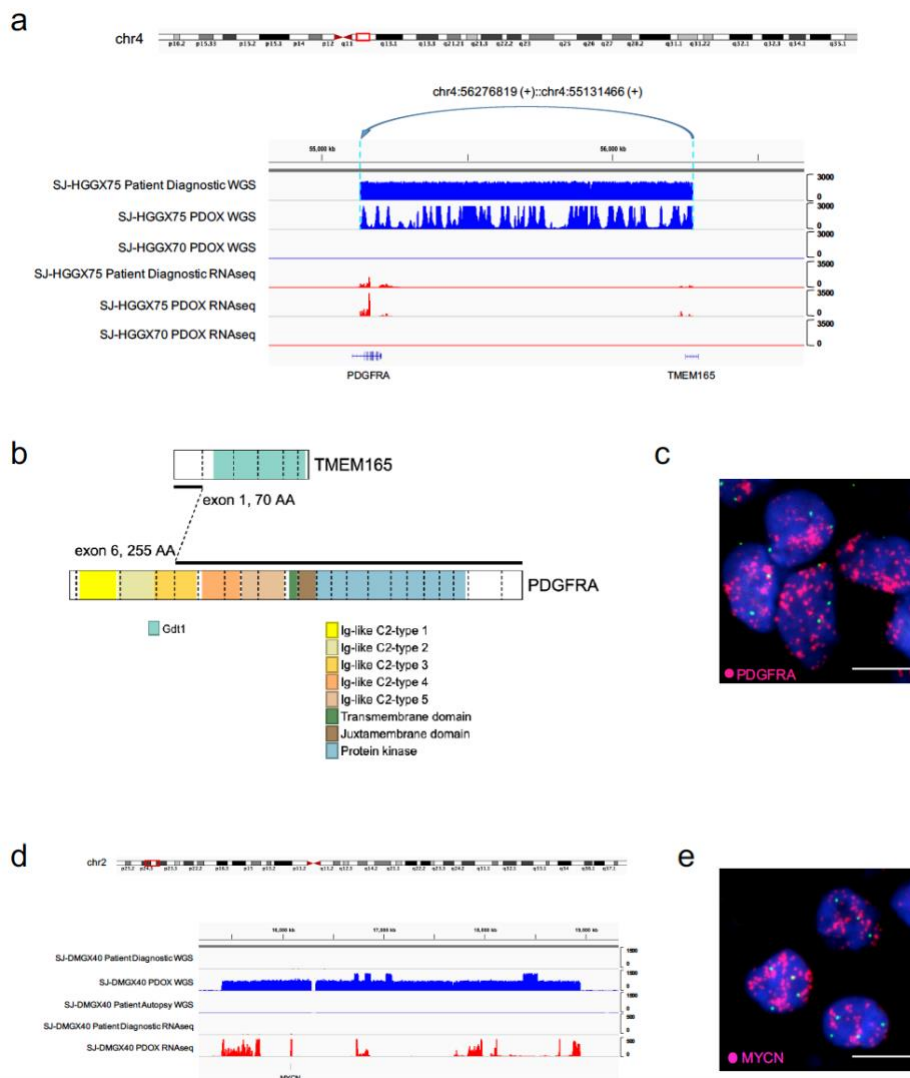

**Supplementary Figure 3: Expression signatures of PDOX models recapitulate primary tumors from which they are derived.** Pearson correlation coefficient of RNA-seq quantification (logCPM) between each PDOX sample and all 16 patient tumors that have matched PDOXs. The red dots represent the Pearson correlation coefficient between each PDOX sample and the matched patient tumor, black dots show correlation between each PDOX sample and other patient tumors. Genes include all mRNA genes except those identified as genes differentially expressed between all PDOX compared to patient tumors (Supplementary Data 3).

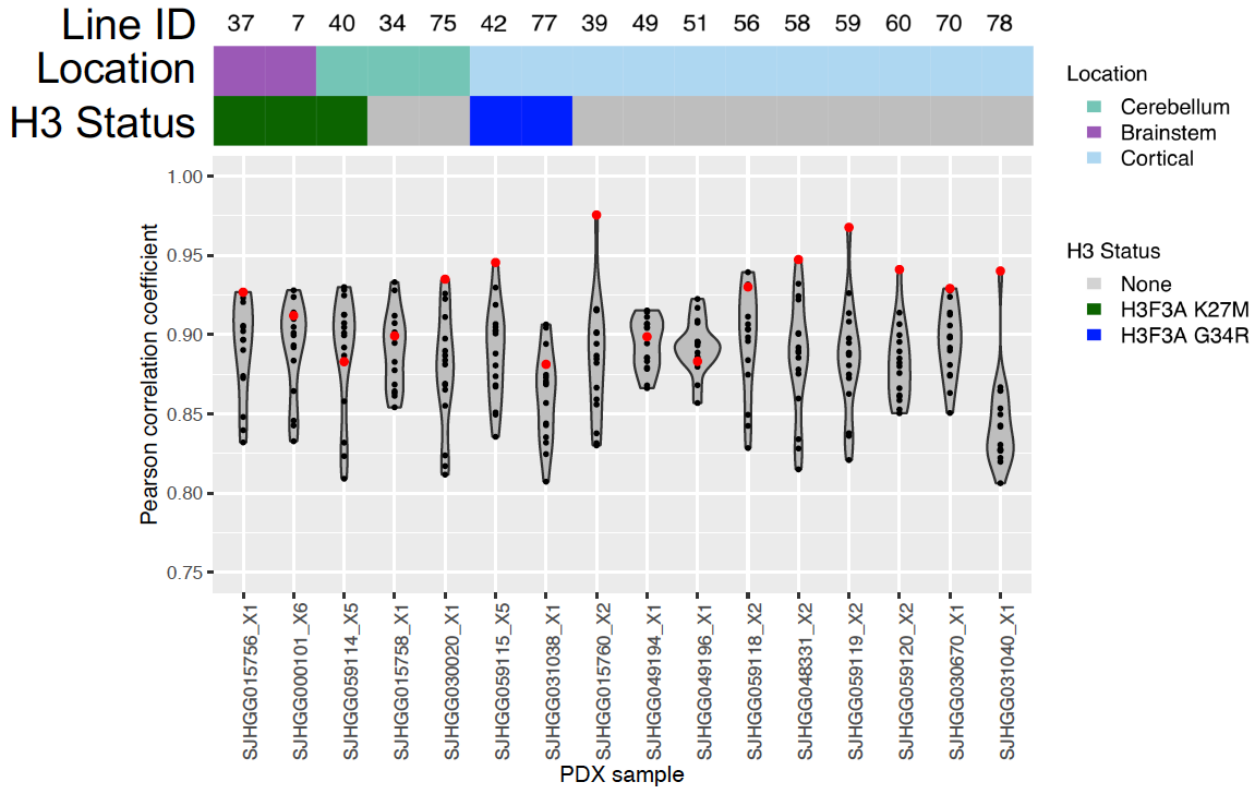

**Supplementary Figure 4. Fidelity of expression signatures in PDOX models from different passages, and in cell lines compared with the PDOX from which they were derived.** Scatterplot comparing expression (RNAseq, logCPM) in indicated PDOX and cell lines.  $p < 2.2 \times 10^{-16}$

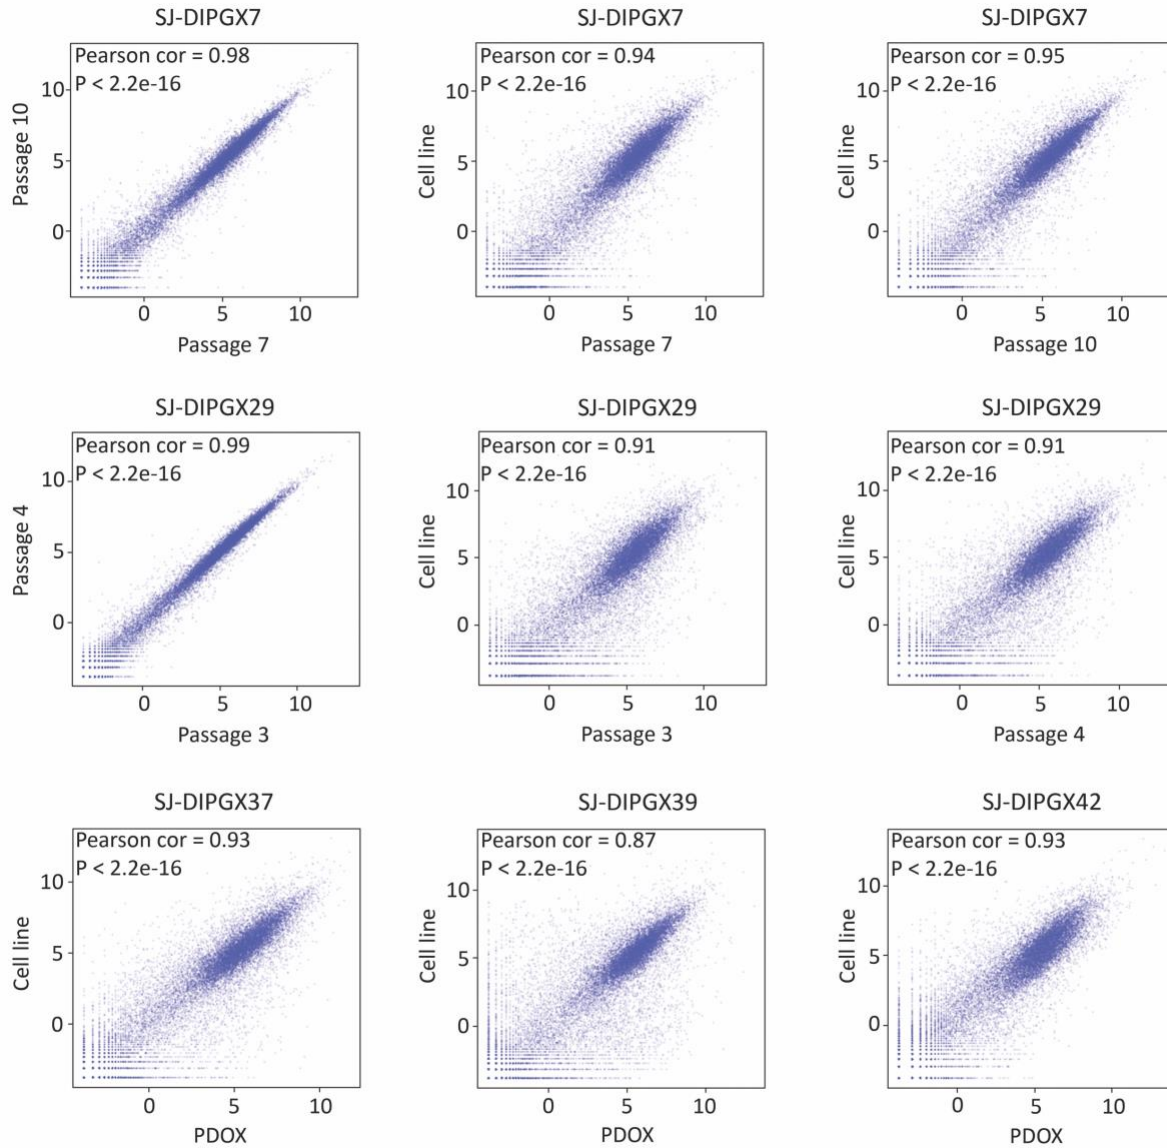

**Supplementary Figure 5: Example summary of pHGG model characterization available through Pediatric Brain Tumor Portal.** Summary data for PDOX line SJ-HGGX42 and associated samples is shown here as a representative example of data available for all 21 PDX models. PDF summaries for each model can be accessed and downloaded from the PBTP, and this information and multiple additional options for interactive exploration of data from this paper are available through the online portal.

## Pediatric Brain Tumor Portal

### Summary

**Name:** SJ-HGGX42  
**Sample ID:** SJHGG059115  
**Disease:** High-grade Glioma  
**Associated Acronyms:** HGG, GBM  
**Histone H3 Status:** H3.3 G34R

### Clinical Information

**Clinical Group:** Cortical HGG  
**Pathologic Group:** Glioblastoma  
**Grade:** IV  
**Patient Sample Type:** Diagnostic  
**Survival from Diagnosis:** 12 months  
**Sex:** Male  
**Patient Tumor Location:** Cortical  
**Treatment History:** Treatment Naive

### Sample Information

**PDOX Label:** YFP-Luciferase  
**Cell Line Label:** YFP-IRES-Luciferase  
**Mouse Survival (PDOX→PDOX):** 5 months  
**Mouse Survival (cell culture→PDOX):** 5 months  
**Material Available:** PDOX, Cell line

### Sequence Source and OncoPrint

| Sample                               | Sample ID       | WGS | WES | RNAseq | Methylation |
|--------------------------------------|-----------------|-----|-----|--------|-------------|
| Patient Germline                     | SJHGG059115_G1  | N/A | N/A | N/A    | N/A         |
| Patient Tumor (Diagnostic)           | SJHGG059115_D1  | ✓   | ✓   | ✓      | ✓           |
| PDOX Tumor (Derived from Diagnostic) | SJHGG059115_X5  | ✓   | ✓   | ✓      | ✓           |
| Cell line (Derived from PDOX)        | SJHGG054830_C2  | N/A | ✓   | ✓      | ✓           |
| PDOX Tumor (Derived from cell line)  | SJHGG059115_X31 | ✓   | ✓   | ✓      | ✓           |
| Patient Tumor (Autopsy)              | SJHGG059115_A1  | ✓   | ✓   | ✓      | ✓           |

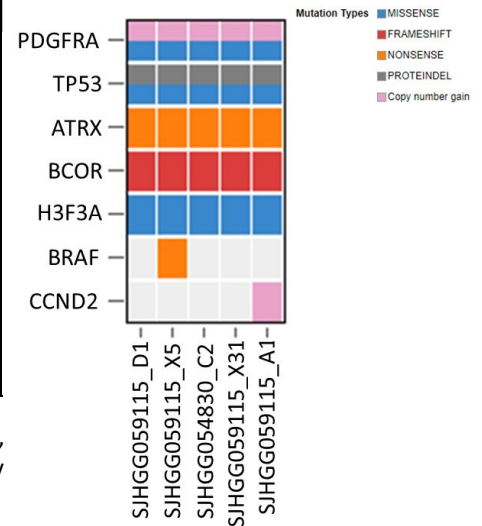

**Table** indicates sequencing performed (✓); WGS, whole genome sequencing; WES, whole exome sequencing; RNAseq, RNA sequencing; Methylation, BeadChip array profiling human DNA methylation; N/A, sequence not available.

**OncoPrint** for pediatric high-grade glioma signature mutations in these samples.

### Histology

#### H&E

Patient Tumor

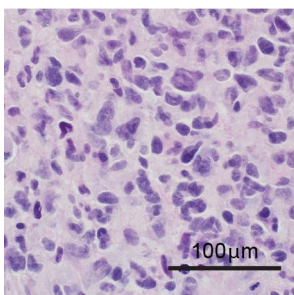

PDOX Tumor

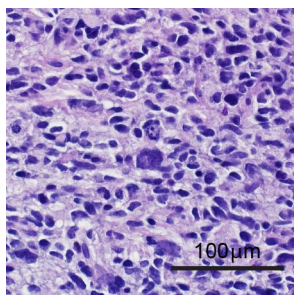

#### ATRX

Patient Tumor

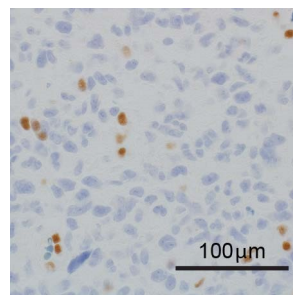

PDOX Tumor

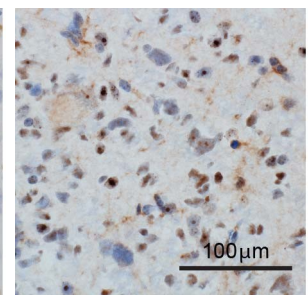

## Mutation Status

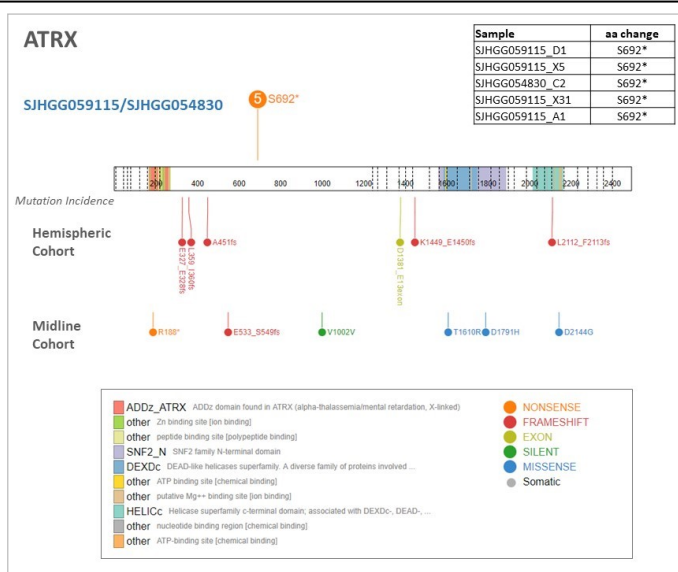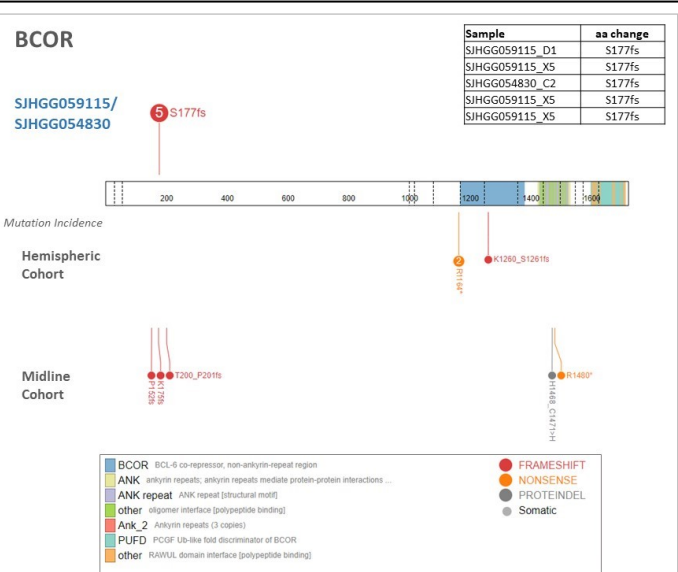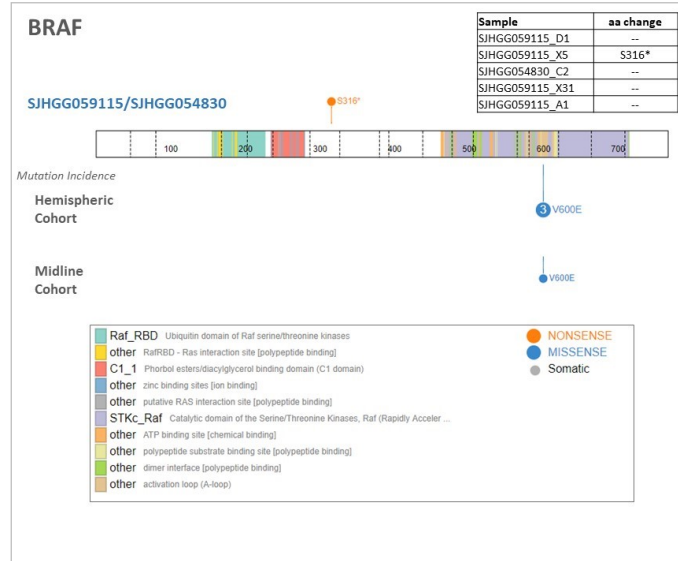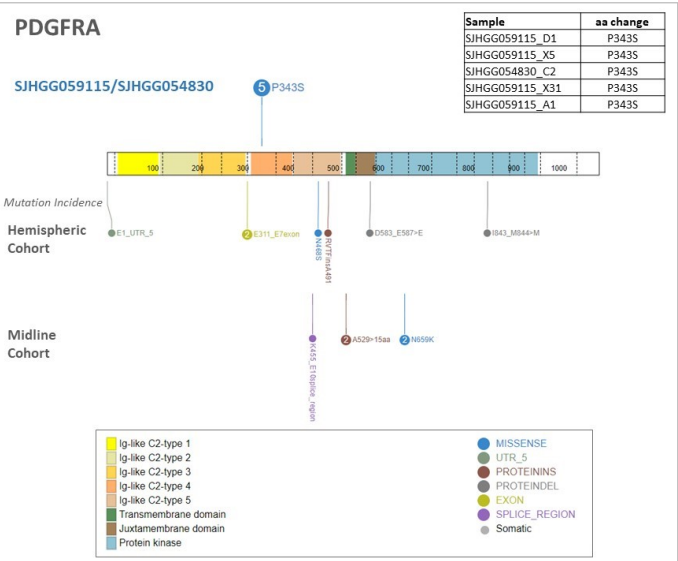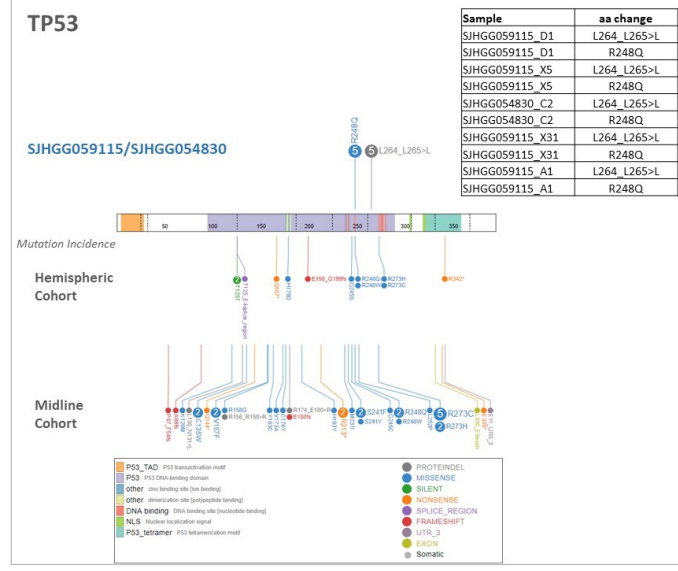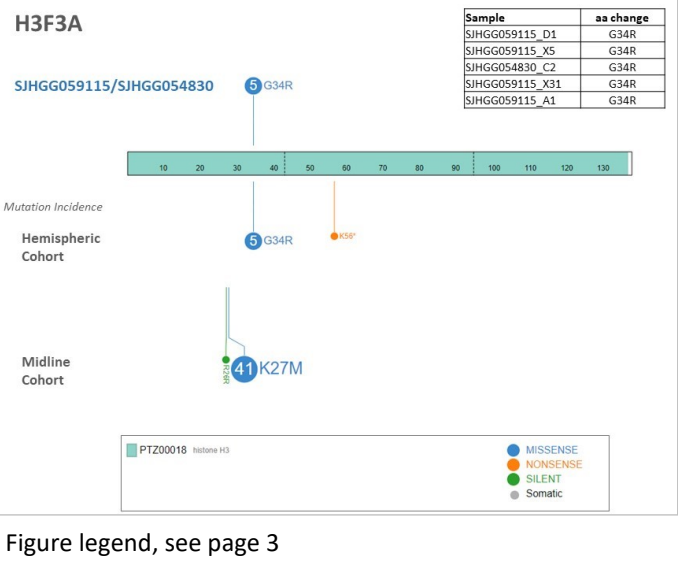

Figure legend, see page 3



## Mutation Status figure legend:

Protein paint diagrams show schematic of protein with functional domains shown in legend box. Mutations associated with samples for this line are shown above the protein diagram. Mutations in cohort of 127 pediatric HGGs separated as hemispheric and midline tumors from [1] are shown below. Number of samples with the specific mutation are listed in the circle marking the mutated residue.

## Copy Number Variation

Patient Tumor  
SJHGG059115\_D

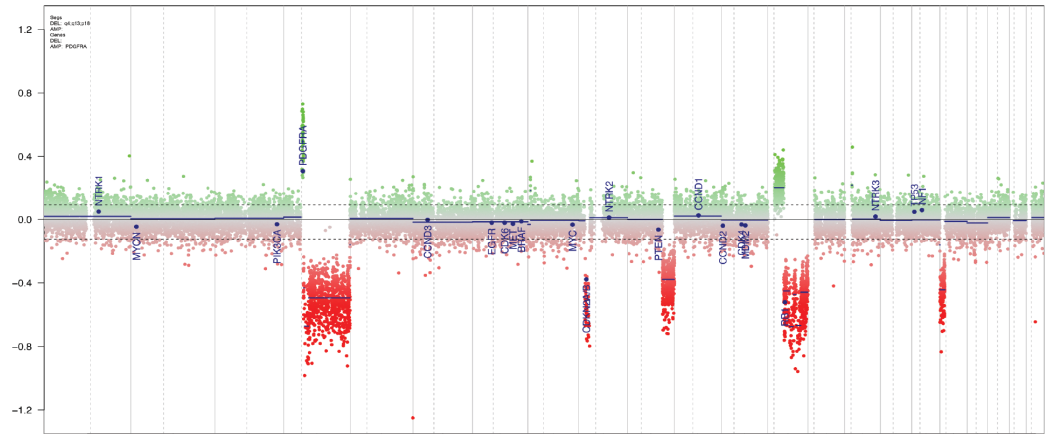

PDOX Tumor  
SJHGG059115\_X

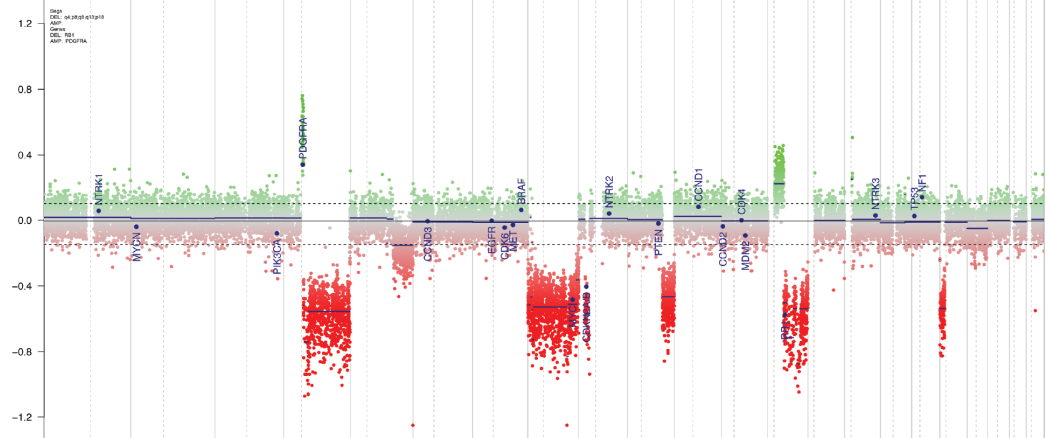

Cell line\*  
SJHGG054830\_C

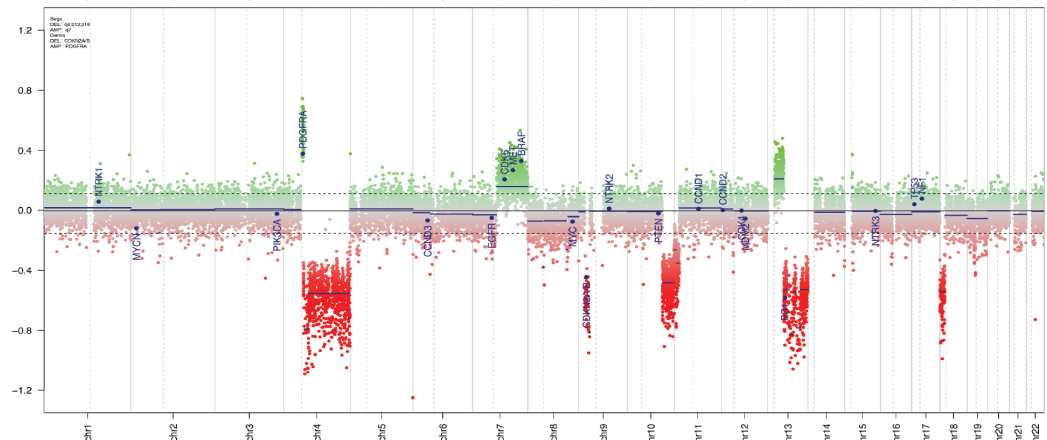

\*Cell line derived from PDOX

DNA copy number variation analysis was performed from methylation array data using Conumee [2]. The Y axis shows the log<sub>2</sub> copy number ratio of the tumor sample compared to a panel of normal reference brain tissues. Copy number ratios are plotted across chromosomes with the dotted vertical lines representing centromeres. Chromosomal gains or losses are detected as significant positive or negative deviations from genomic baseline. Brain tumor relevant gene regions are highlighted for easier assessment of chromosomal or focal alterations.

**Brain Tumor Methylation Classification**

t-SNE plot showing glioma subgroups based on DNA methylation profiling. Patient tumors (circles), PDOX (squares) and cell lines (diamonds) reported here are outlined in black and reference samples from [3] shown without black outline. Enlarged area shows the methylation class cluster for this sample, and circled samples show the matched samples for this PDOX.

| Sample                        | Methylation Class                           |
|-------------------------------|---------------------------------------------|
| Patient Tumor                 | glioblastoma, IDH wildtype, H3.3 G34 mutant |
| PDOX Tumor                    | glioblastoma, IDH wildtype, H3.3 G34 mutant |
| Cell Line (derived from PDOX) | glioblastoma, IDH wildtype, H3.3 G34 mutant |

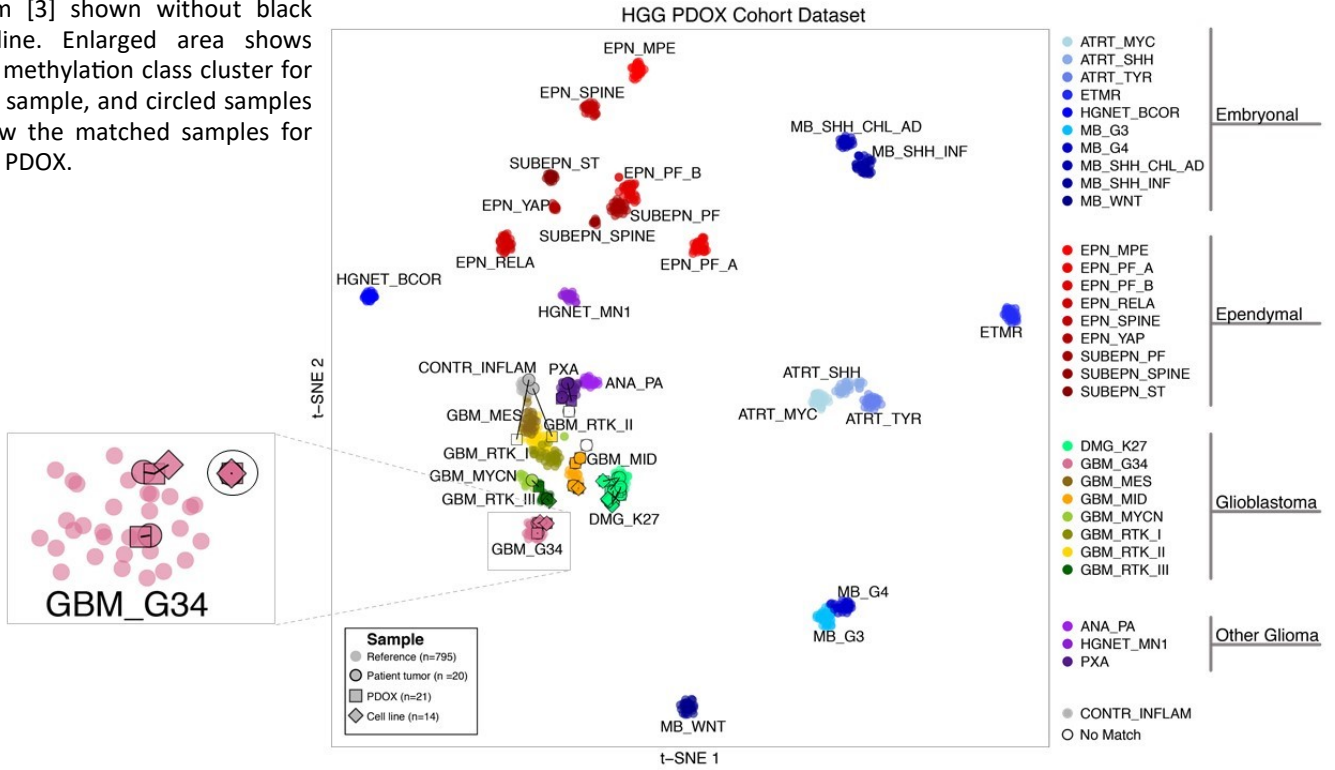

**Short Tandem Repeat (STR) DNA Typing**

| Marker     | Allele 1 | Allele 2 |
|------------|----------|----------|
| Amelogenin | X        | Y        |
| CSF1PO     | 10       | 11       |
| D13S317    | 13       |          |
| D16S539    | 9        | 11       |
| D18S51     | 12       | 18       |
| D21S11     | 29       | 30       |
| D3S1358    | 14       | 15       |
| D5S818     | 13       |          |
| D7S820     | 11       | 12       |
| D8S1179    | 13       |          |
| THO1       | 6        | 9.3      |
| TPOX       | 9        | 11       |
| vWA        | 17       | 18       |

DNA fingerprint from Promega PowerPlex 16 STR assay.

**References**

1. Wu, G. *et al. Nat. Gen.* **46**, 444-450 (2014).
2. Hovestadt, V. & Zapatka, M. Conumee: enhanced copy-number variation analysis using Illumina methylation arrays. v.1.4.2 R package v.0.99.4 <http://www.bioconductor.org/packages/release/bioc/html/conumee.html> (2015) .
3. Capper, D. *et al. Nature.* **555**, 469-474 (2018).

**Supplementary Figure 6: DIPG cells grown as tumorspheres or adherent cultures on Geltrex basement membrane matrix respond similarly when tested with 53 drugs representing a range of different mechanisms of action.**

Scatterplot of AUCs testing dose-response for 53 compounds in SJ-DIPGX7c grown under adherent vs neurosphere conditions. The Pearson correlation is 0.994. Black line has slope = 1.

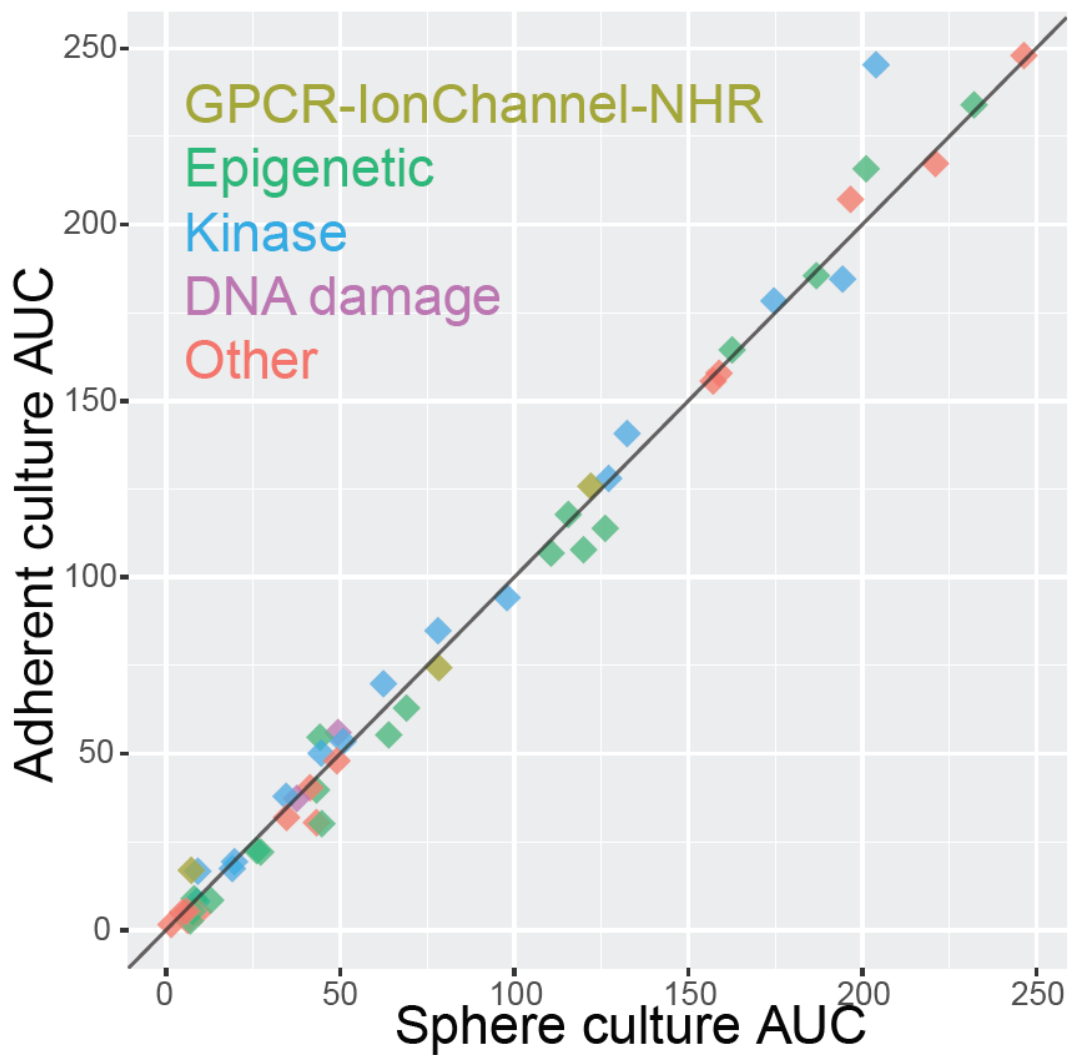

**Supplementary Figure 7: Z prime values for drug screening in 16 cell lines from 310 384-well assay plates.** Scatterplot of Z prime values for each plate screened in this study color coded by cell lines assayed. A Z prime score between 0.5 and 1 indicates an excellent signal to noise ratio.

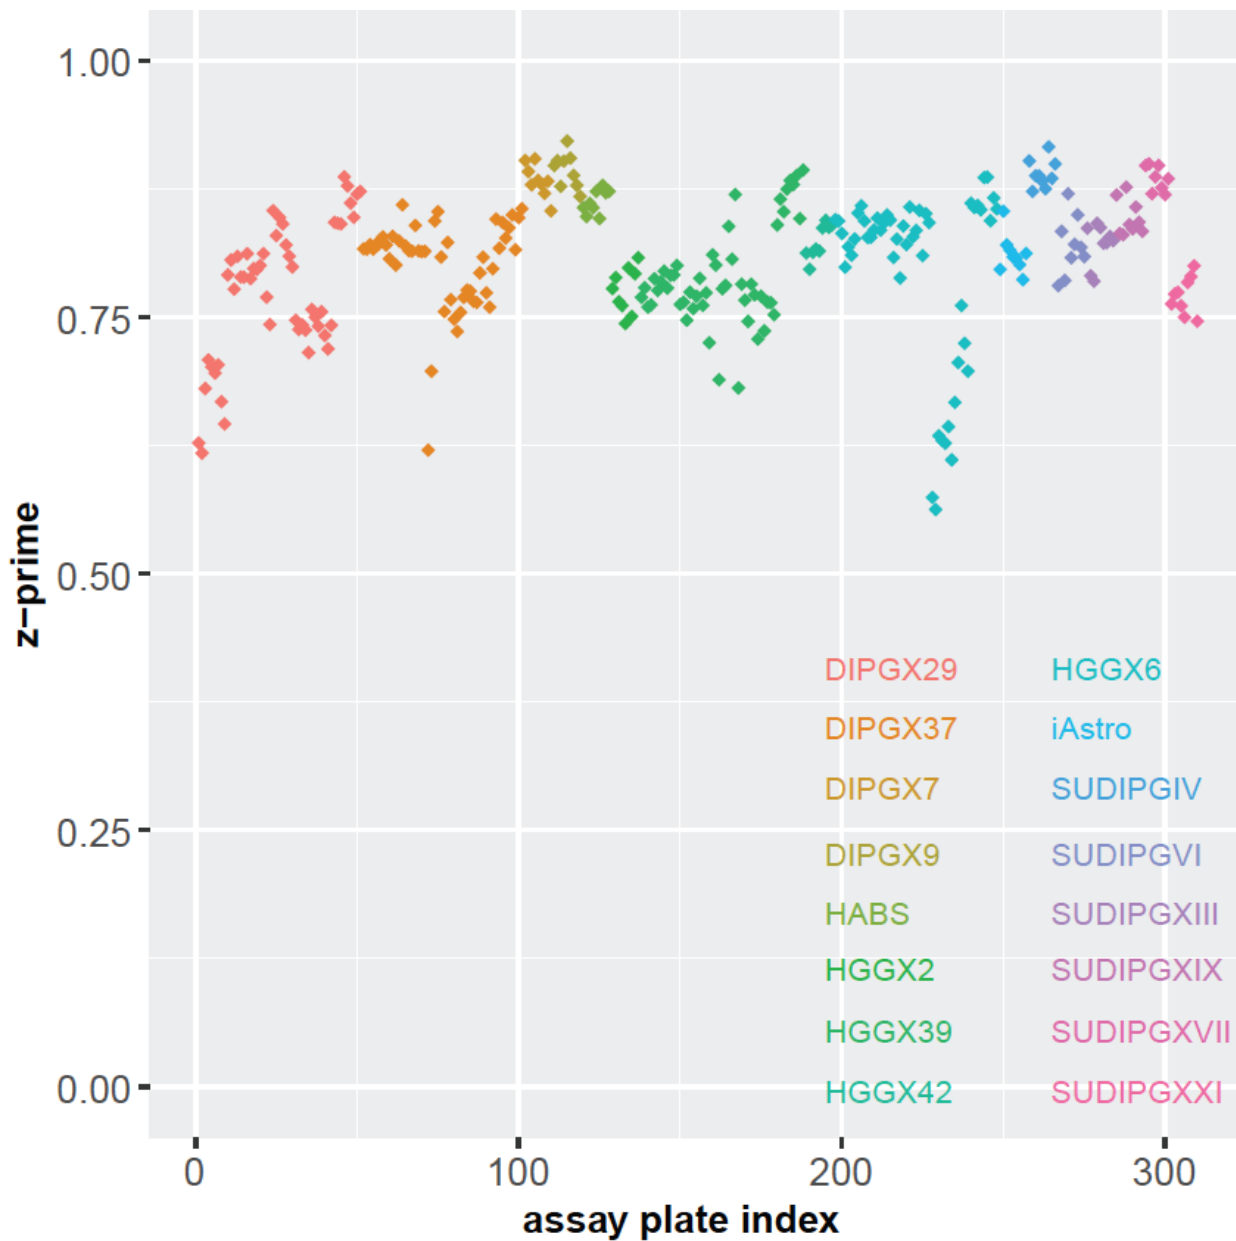

**Supplementary Figure 8: Additional analysis of the screening results from 93 compounds across 14 pHGG models and two normal astrocyte lines.** (a) Select dose-response curves for the drugs highlighted in Figure 6b. iAstro is depicted in black dashed lines, HABS in black solid lines, and pHGG models are colored gray or by histone mutation status where DIPGX37 is indicated. (b) Scatterplot of MAPK pathway activation score (MPAS) vs AUC for all 14 pHGG cell lines treated with trametinib. The Pearson correlation is -0.34. (c) Unsupervised hierarchical clustering of drug AUC z-scores for all compounds tested. Column and column labels are color coded by histone mutation status. Each row represents a single compound and is annotated by mechanism of action with color code shown above. The color code for histone mutation status is: H3-wt (red), H3.3 G34R (blue), H3.1 K27M (turquoise), and H3.3 K27M (green). Control cell lines (iAstro and HABS) are black.

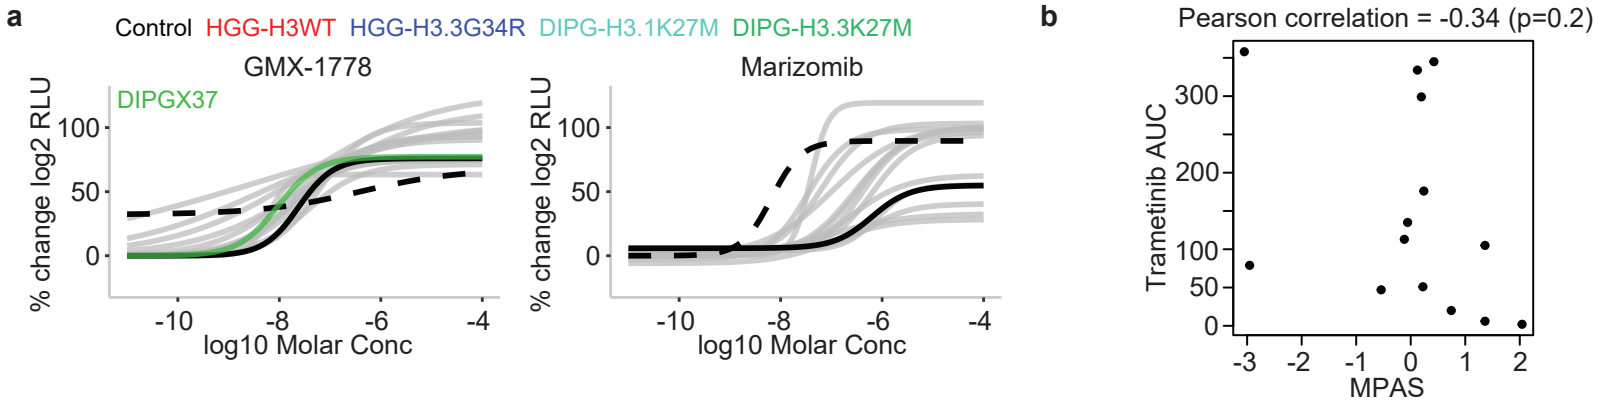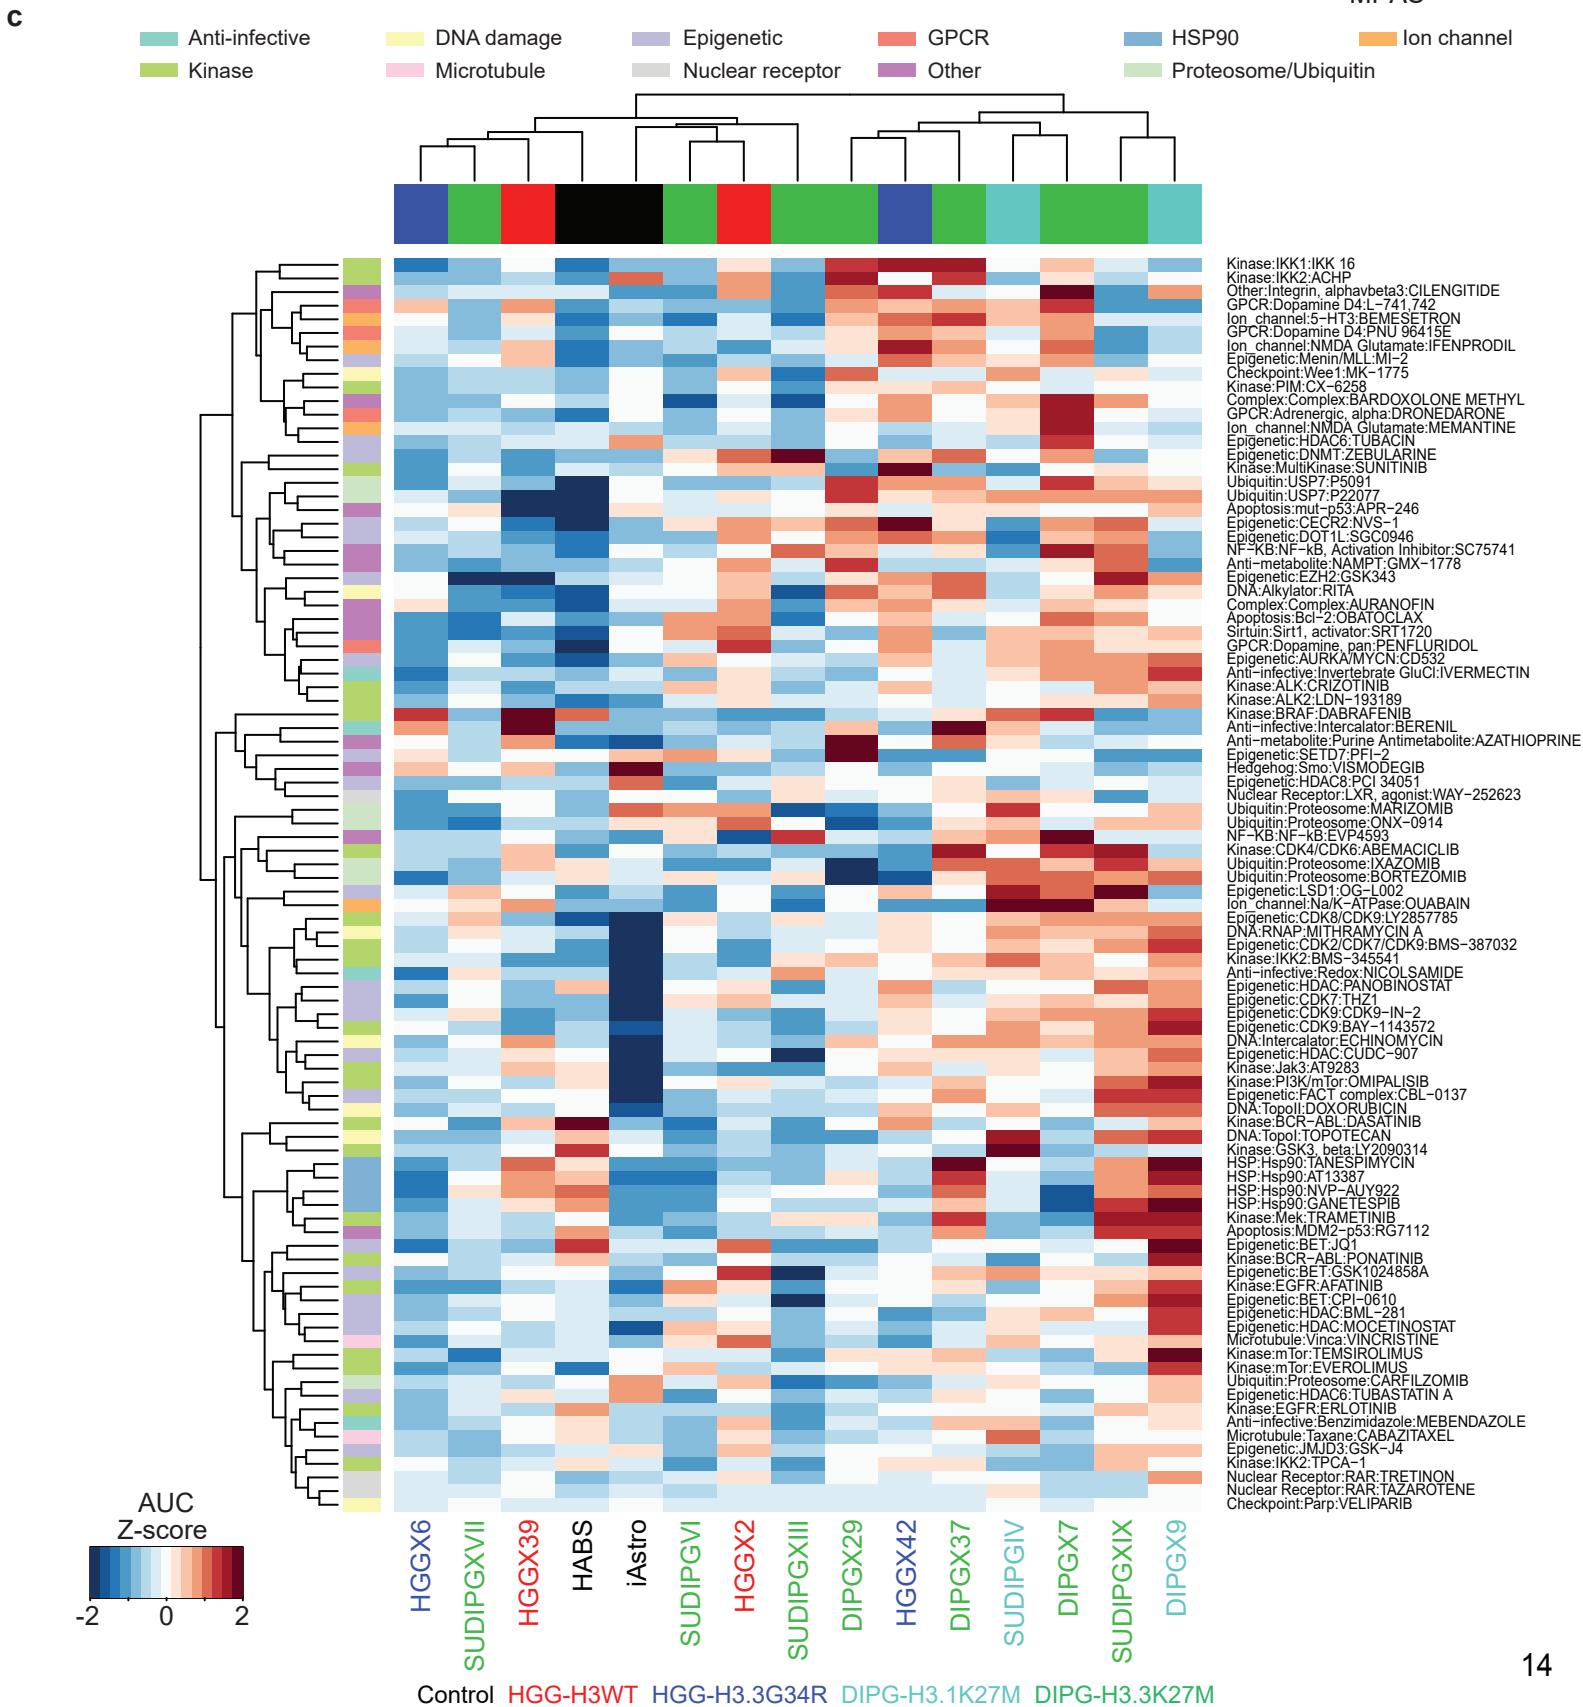

**Supplementary Fig. 9: Pharmacodynamic analyses of mirdametininb and paxalisib show effective MEK and PI3K pathway inhibition in the brain**

Western blots from a single pharmacodynamic experiment with the indicated antibodies to analyze lysates from: (a) SJ-DIPGX37 intracranial tumors in mice dosed with vehicle (veh, lanes 1-3), 25 mg/kg mirdametininb (mir, lanes 4-6), or 18 mg/kg paxalisib (pax, lanes 7-9) daily for 5 days, and tissue collected 2 hours after last dose. Antibodies are shown at the right. (b) Brain from CD1-nude mice treated with vehicle (lanes 1-3), 8 mg/kg pax (lanes 4-6), 12 mg/kg pax (lanes 7-9), 8 mg/kg pax + 14 mg/kg mir (lanes 10-12) and 12 mg/kg pax + 17 mg/kg mir (lanes 13-15). (c) Brain from CD1-nude mice treated with vehicle (lanes 1-3), 14 mg/kg mir (lanes 4-6), 17 mg/kg mir (lanes 7-9), 14 mg/kg mir + 8 mg/kg pax (lanes 10-12) and 17 mg/kg mir + 12 mg/kg pax (lanes 13-15). n=3 mice per treatment, with each lane containing lysate from one mouse.

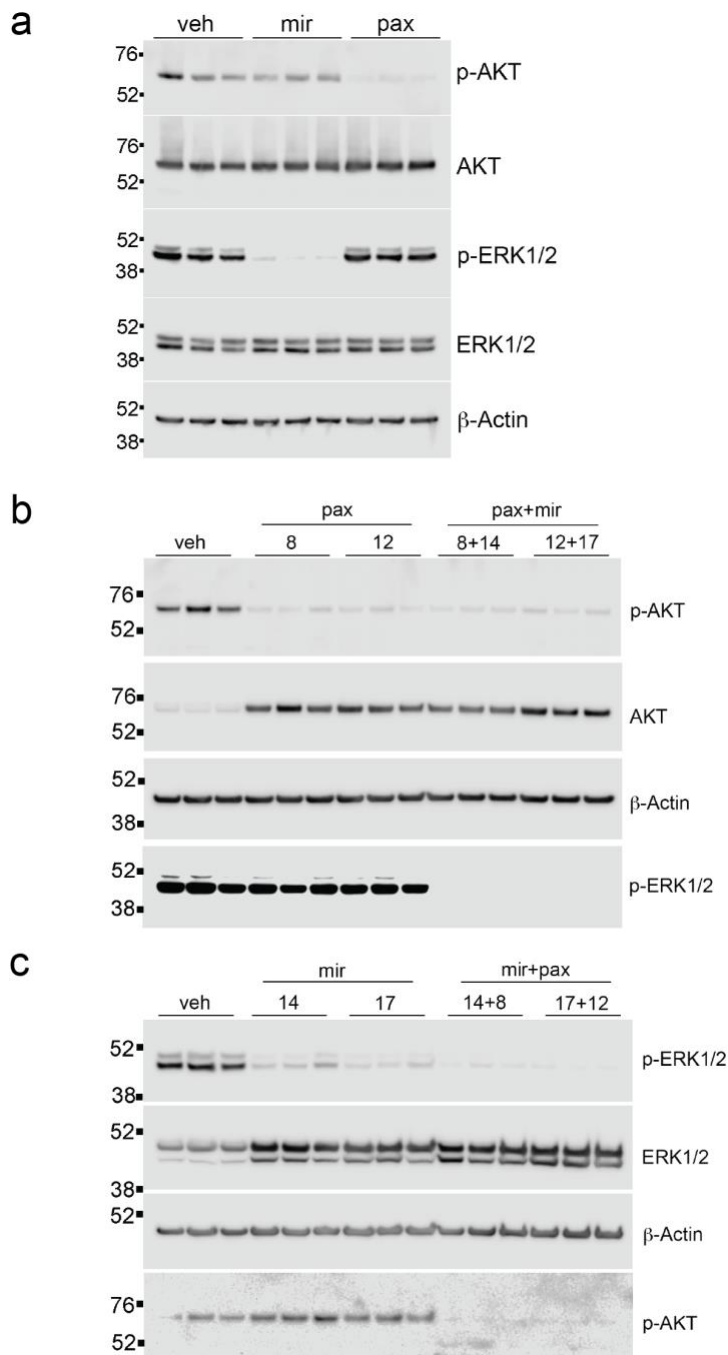

**Supplementary Fig 10: Pharmacokinetic (PK) and pharmacodynamic analyses of Paxalisib and Mirdametininib show lack of appreciable plasma or brain PK drug interaction, high brain exposure, and effective pathway inhibition**

- a. Mirdametininib population mean and 90% prediction interval plasma concentration-time profiles alone (mir) and in combination with Paxalisib (mir+pax). A minor increase in Mirdametininib AUC (1.30-fold) was observed in combination.
- b. Paxalisib population mean and 90% prediction interval plasma concentration-time profiles alone (pax) and in combination with Mirdametininib (pax+mir). A minor increase in Paxalisib AUC (1.63-fold) was observed in combination.
- c. Mirdametininib mean and standard deviation brain concentration-time profiles alone (mir) and in combination with Paxalisib (mir+pax) with 3 individual mice per time point. Only the 2-hour time point is significantly higher for the combination (907 vs 498 ng/mL, two-way ANOVA with Time-Combination interaction on log-transformed concentrations, Tukey HSD  $p=0.0001394$ )
- d. Paxalisib mean and standard deviation brain concentration-time profiles alone (pax) and in combination (pax+mir) with 3 individual mice per time point. There are no significant differences between the groups for any time point at the  $\alpha=0.05$  level (two-way ANOVA with Time-Combination interaction on log-transformed concentrations).

The error bars indicate the mean +/- SD.



Supplementary Fig 10: Pharmacokinetic (PK) analyses of Paxalisib and Mirdametininib show a lack of appreciable plasma or brain drug interaction and show high brain exposure

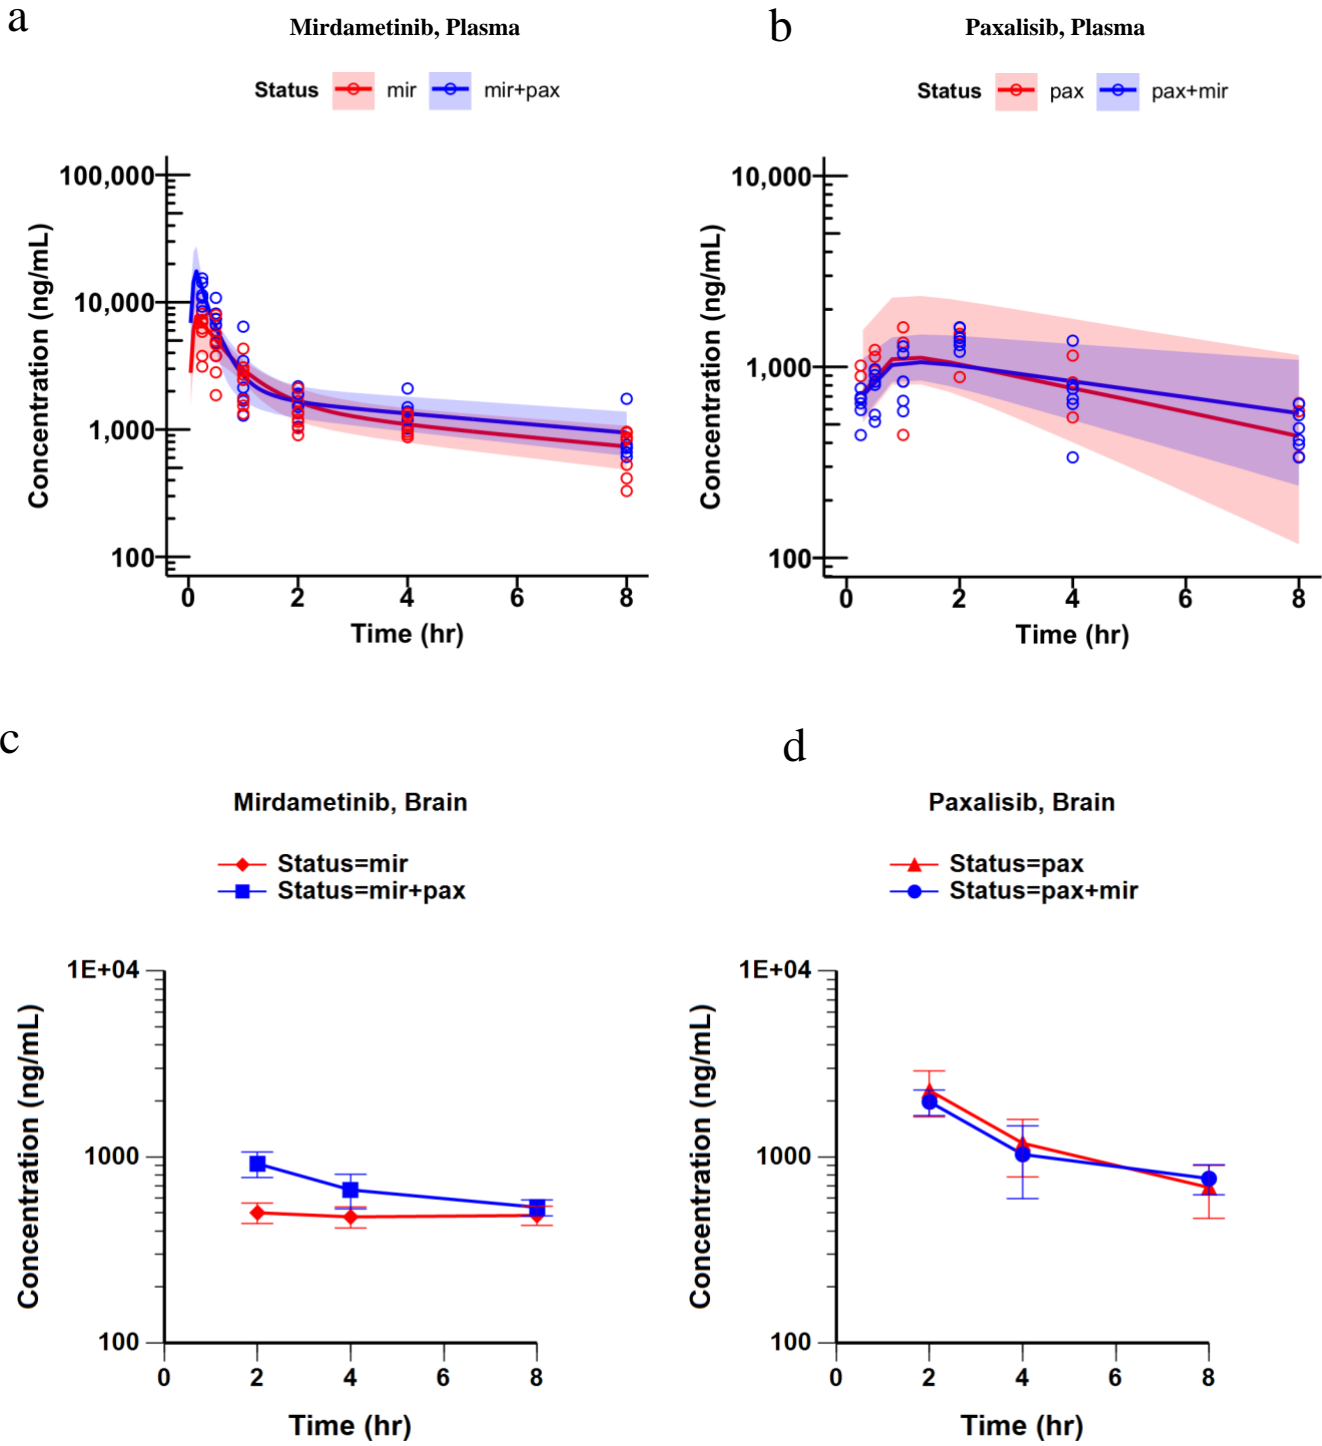

## SUPPLEMENTARY TABLES

**Supplementary Table 1: Cell line models used in HTS**

| Cell Line Name           | Histone mutation status | Doubling-time 384W (coated) (days) | Seeding number (thousand) | PDOX Methylation Classification              | Signature Mutations                                      |
|--------------------------|-------------------------|------------------------------------|---------------------------|----------------------------------------------|----------------------------------------------------------|
| SJ-HGGX2c                | Wild-type               | 8.2                                | 8                         | Glioblastoma, IDH wildtype, subclass midline | TP53, PDGFRA, PIK3R1, MET                                |
| SJ-HGGX39c               | Wild-type               | 3.7                                | 4                         | Glioblastoma, IDH wildtype, subclass RTK III | TP53, BCOR, CDKN2A, PDGFRA                               |
| SJ-HGGX6c                | H3.3G34R                | 5.6                                | 8                         | Glioblastoma, IDH wildtype, H3.3 G34 mutant  | H3F3A (H3.3 G34R), PDGFRA, TP53, HIST2H3D, ATRX          |
| SJ-HGGX42c               | H3.3G34R                | 6.1                                | 8                         | Glioblastoma, IDH wildtype, H3.3 G34 mutant  | H3F3A (H3.3 G34R), TP53, ATRX, BCOR, PDGFRA, BRAF, CCND2 |
| SJ-DIPGX7c               | H3.3K27M                | 6.1                                | 8                         | Diffuse midline glioma, H3 K27M mutant       | H3F3A (H3.3 K27M), BCOR, TP53, PIK3CA                    |
| SJ-DIPGX9c               | H3.1K27M                | 9.1                                | 8                         | Diffuse midline glioma, H3 K27M mutant       | HIST1H3B (H3.1 K27M), ACVR1, PIK3CA                      |
| SJ-DIPGX29c              | H3.3K27M                | 9.0                                | 8                         | Diffuse midline glioma, H3 K27M mutant       | H3F3A (H3.3 K27M), TP53, CCND3                           |
| SJ-DIPGX37c              | H3.3K27M                | 9.0                                | 8                         | Diffuse midline glioma, H3 K27M mutant       | H3F3A (H3.3 K27M), PIK3R1, PPM1D, NTRK1, PIK3CA          |
| SU-DIPG-IV               | H3.1K27M                | 3.0                                | 8                         | Diffuse midline glioma, H3 K27M mutant       | HIST1H3B (H3.1 K27M), MDM4, ACVR1                        |
| SU-DIPG-VI               | H3.3K27M                | 5.8                                | 8                         | Diffuse midline glioma, H3 K27M mutant       | H3F3A (H3.3 K27M), TP53                                  |
| SU-DIPG-XIII             | H3.3K27M                | 6.6                                | 8                         | Diffuse midline glioma, H3 K27M mutant       | H3F3A (H3.3 K27M)                                        |
| SU-DIPG-XVII             | H3.3K27M                | 5.8                                | 4                         | Diffuse midline glioma, H3 K27M mutant       | H3F3A (H3.3 K27M)                                        |
| SUDIPG-XIX               | H3.3K27M                | 4.6                                | 8                         | Diffuse midline glioma, H3 K27M mutant       | H3F3A (H3.3 K27M)                                        |
| SU-DIPG-XXI <sup>1</sup> | H3.1K27M                | 4.6                                | 8                         | Diffuse midline glioma, H3 K27M mutant       | HIST1H3B (H3.1 K27M)                                     |
| iAstro                   | Wild-type               | 2.8                                | 4                         | Not a PDOX                                   | None                                                     |
| HA-bs                    | Wild-type               | 11.3                               | 8                         | Not a PDOX                                   | None                                                     |
| hNSC                     | Wild-type               | 2.6                                | 4                         | Not a PDOX                                   | None                                                     |

**Supplementary Table 2: Resource table of all reagents used for this study**

**Supplementary Table 2: Resource Table includes all reagents used for this study**

|                                                                         |                                     |
|-------------------------------------------------------------------------|-------------------------------------|
| HyClone™ Phosphate Buffered Saline (PBS)                                | Fisher Scientific, SH3025601        |
| Paraformaldehyde, EM Grade                                              | Electron Microscopy Sciences, 19200 |
| Hematoxylin                                                             | Fisher Scientific, 7221             |
| Eosin                                                                   | Fisher Scientific, 7111             |
| Anti-mouse biotinylated secondary antibodies                            | Vector Laboratories, BA-2000        |
| Anti-rabbit biotinylated secondary antibodies                           | Vector Laboratories, BA-1000        |
| Horseradish-peroxidase-conjugated streptavidin VECTASTAIN Elite ABC Kit | Vector Laboratories, PK-6100        |
| DAB substrates                                                          | Vector Laboratories, SK-4100        |
| Hematoxylin (for counter staining).                                     | Vector Laboratories, H-3401         |
| RIPA Buffer (10×)                                                       | Cell Signaling, 9806                |
| cOmplete™ Protease Inhibitor Cocktail                                   | Sigma-Aldrich, 11697498001          |
| PhosSTOP™                                                               | Sigma-Aldrich, 4906845001           |
| Micro BCA™ Protein Assay Kit                                            | ThermoFisher, 23235                 |
| NuPAGE MES SDS Running Buffer (20×)                                     | ThermoFisher, NP0002                |
| NuPAGE™ 12%, Bis-Tris, 1.0 mm, Mini Protein Gel                         | ThermoFisher, NP0341PK2             |
| NuPAGE™ Transfer Buffer (20×)                                           | ThermoFisher, NP00061               |
| NuPAGE™ Sample Reducing Agent (10×)                                     | ThermoFisher, NP0004                |
| NuPAGE™ LDS Sample Buffer (4×)                                          | ThermoFisher, NP0007                |
| NuPAGE™ 4 to 12%, Bis-Tris, 1.0 mm, Midi Protein Gel                    | ThermoFisher, WG1403BOX             |
| Restore™ PLUS Western Blot Stripping Buffer                             | ThermoFisher, 46430                 |
| Pierce™ 20× TBS Buffer                                                  | ThermoFisher, 28358                 |
| TWEEN® 20                                                               | Bio-Rad, 1706531                    |
| Rabbit IgG HRP Linked Whole Ab (from Donkey)                            | MilliporeSigma GENA934-100UL        |
| Mouse IgG HRP Linked Whole Ab Cytiva, NXA931                            | MilliporeSigma GENXA931-1ML         |
| Amersham™ ECL™ Rainbow™ Marker - Full range                             | MilliporeSigma GERPN800E            |
| SuperSignal™ West Dura Extended Duration Substrate                      | ThermoFisher 34075                  |
| Nitrocellulose/Filter Paper Sandwiches, 0.2 µm, 8.5 x 13.5 cm           | ThermoFisher LC2009                 |
| Akt Antibody Rabbit pAb (1:1000 Western)                                | Cell Signaling, 9272                |
| Phospho-Akt (Ser473) Antibody Rabbit pAb (1:50 IHC and 1:1000 Western)  | Cell Signaling, 9271                |
| p44/42 MAPK (Erk1/2) Antibody Rabbit (1:1000 IHC and Western)           | Cell Signaling, 9102                |

|                                                                                       |                                               |
|---------------------------------------------------------------------------------------|-----------------------------------------------|
| Phospho-p44/42 MAPK (Erk1/2) (Thr202/Tyr204) Antibody Rabbit (1:1000 IHC and Western) | Cell Signaling, 9101                          |
| Phospho-Histone H3 (Ser10) Antibody (1:200 IHC)                                       | Cell Signaling, 9701                          |
| Cleaved Caspase-3 Antibody Rabbit mAb (1:500 IHC)                                     | BD, #559565                                   |
| Anti-Nuclei Antibody, clone 235-1 (1:100 IF)                                          | Millipore, MAB1281                            |
| Anti-Mitochondria Antibody, surface of intact mitochondria, clone 113-1 (1:50 IF)     | Millipore, MAB1273                            |
| Mouse Cell Depletion Kit                                                              | Miltenyi Biotec, 130-104-694                  |
| KnockOut™ DMEM/F-12                                                                   | ThermoFisher, 12660012                        |
| Neurobasal® Medium, minus phenol red                                                  | ThermoFisher, 12348017                        |
| B-27® Supplement, minus vitamin A                                                     | ThermoFisher, 12587010                        |
| N-2 Supplement                                                                        | ThermoFisher, 17502048                        |
| StemPro® Neural Supplement                                                            | ThermoFisher, A1050801                        |
| Recombinant Human EGF                                                                 | Peptotech, AF-100-15                          |
| Recombinant Human FGF-b                                                               | Peptotech, 100-18B                            |
| Recombinant Human PDGF-AA                                                             | Cell Guidance Systems, GFH16AF-100            |
| Recombinant Human PDGF-BB                                                             | Cell Guidance Systems, GFH18AF-100            |
| 0.2% Heparin Sodium Salt in PBS                                                       | StemCell, 07980                               |
| Sodium Pyruvate (100 mM)                                                              | ThermoFisher, 11360070                        |
| MEM Non-Essential Amino Acids Solution (NEAA)                                         | ThermoFisher, 11140050                        |
| GlutaMAX™ Supplement                                                                  | ThermoFisher, 35050061                        |
| Bovine Albumin Fraction V (7.5% solution)                                             | ThermoFisher, 15260037                        |
| Penicillin-Streptomycin (10,000 U/mL)                                                 | ThermoFisher, 15140122                        |
| DMEM/F-12, HEPES                                                                      | ThermoFisher, 11330032                        |
| ACCUTASE™ cell detachment solution                                                    | Innovative Cell Technologies, Inc., AT 104    |
| Accumax™ cell detachment solution                                                     | Innovative Cell Technologies, Inc., AM 105    |
| HEPES (1M)                                                                            | ThermoFisher, 15630080                        |
| Geltrex™ LDEV-Free, hESC-Qualified                                                    | ThermoFisher, A1413302                        |
| Corning™ Matrigel™ hESC-Qualified Matrix                                              | FisherScientific, 08-774-552 Corning™, 354277 |
| Primocin                                                                              | Invivogen, ant-pm-1                           |
| ENStem-A™ Neural Freezing Medium (1X)                                                 | EMDMillipore, SCM011                          |
| STEMdiff™ Neural Progenitor Freezing Medium                                           | StemCell, 05838                               |
| Cell Freezing Medium-DMSO 1x                                                          | MilliporeSigma, C6295                         |
| NeuroCult™ Proliferation Kit (Mouse & Rat)                                            | StemCell, 05702                               |
| Corning® 384-well Flat Clear Bottom White Polystyrene TC-treated Microplates          | Corning, 3765                                 |
| BrandTech, 384-well pureGrade™ S                                                      | BrandTech, 781686                             |
| Corning® 96-well polypropylene deep well V-bottom                                     | Corning, 3960                                 |

|                                                                                                          |                                                 |
|----------------------------------------------------------------------------------------------------------|-------------------------------------------------|
| Corning® Ultra-Low Attachment 25cm <sup>2</sup> Rectangular Canted Neck Cell Culture Flask with Vent Cap | Corning, 3815                                   |
| Corning® Ultra-Low Attachment 75cm <sup>2</sup> U-Flask Canted Neck Cell Culture Flask with Vent Cap     | Corning, 3814                                   |
| Corning® 75cm <sup>2</sup> U-Shaped Canted Neck Cell Culture Flask with Vent Cap                         | Corning, 430641U                                |
| Corning® 175cm <sup>2</sup> U-Shaped Angled Neck Cell Culture Flask with Vent Cap                        | Corning, 431080                                 |
| Falcon™ Cell Strainers                                                                                   | FisherScientific, 08-771-1                      |
| MACS SmartStrainers (30 µm)                                                                              | Miltenyi Biotec, 130-098-458                    |
| MidiMACS™ Separator and Starting Kits                                                                    | Miltenyi Biotec, 130-090-329                    |
| LS Columns                                                                                               | Miltenyi Biotec, 130-042-401                    |
| Papain                                                                                                   | Worthington, LS003126                           |
| N-Acetyl-L-cysteine (NAC)                                                                                | Sigma-Aldrich, A9165                            |
| DNase I, from bovine pancreas                                                                            | Sigma-Aldrich, 11284932001                      |
| D-Luciferin, Firefly                                                                                     | PerkinElmer, 122799                             |
| CellTiter-Glo® Luminescent Cell Viability Assay                                                          | Promega, G7573                                  |
| Methyl cellulose                                                                                         | Sigma-Aldrich, M7027                            |
| TWEEN® 80                                                                                                | Sigma-Aldrich, P4780                            |
| Distilled Water for formulation                                                                          | ThermoFisher, 15230147                          |
| Human iPSC-derived astrocytes, Tempo-iAstro™                                                             | Tempo Bioscience®                               |
| Human Astrocytes-brain stem, HA-bs                                                                       | ScienCell Research Laboratories, 1840           |
| GIBCO® Human Neural Stem Cells (H9 hESC-Derived)                                                         | Invitrogen, N7800-100                           |
| GDC-0084                                                                                                 | Chemgood (company ID#C-11-41), CAS#1382979-94-3 |
| PD-0325901                                                                                               | Chemietek (Lot#03), CAS# 391210-10-9            |

**Supplementary Table 3: Primer sequences**

| Primer Names          | Sequence                                                   | Amplicon size (bp) |
|-----------------------|------------------------------------------------------------|--------------------|
| Human <i>H3F3A</i> -F | GTA AAA CGA CGG CCA GTG ATT TTG GGT<br>AGA CGT AAT CTT CA  | 450                |
| Human <i>H3F3A</i> -R | CAG GAA ACA GCT ATG ACC TTT CCT GTT<br>ATC CAT CTT TTT GTT | 450                |
| Mouse <i>h3f3A</i> -F | AGA CAC TAT CCC ACT GCT CGA CG                             | 442                |
| Mouse <i>h3h3A</i> -R | GGG GCG TCT CTC TGG TTT TGG C                              | 442                |

## Supplementary Note 1

### Detailed information for drug-drug interaction pharmacokinetic study of mirdametininib and paxalisib in non-tumor bearing female CD-1 nude mice

#### In Vivo Pharmacokinetic (PK) Study Design

The plasma pharmacokinetics (PK) of the MEK inhibitor mirdametininib (PD-0325901) and PI3K inhibitor paxalisib (GDC-0084) were studied to determine whether a PK drug-drug interaction (DDI) exists between these agents when co-administered orally in mice. A moderate interaction, defined as a  $\geq 2$ -fold difference in plasma area under the concentration-time curve (AUC) or apparent oral clearance (CL/F), was considered as impactful and practically significant.

In the main study (Study 1), 3 groups of 9 mice each were studied with a mixed, staggered survival and terminal sampling design. Mirdametininib (Chemietech, CT-PD03, Lot# 3) and paxalisib (Chemgood, C-1141) were each suspended in 1% methylcellulose (type 400 cPs) / 1% Tween 80, with the combination co-formulated and administered as a single 10 mL/kg gavage. On Day 1, mice received single 5 mL/kg oral doses of each drug alone, with 2 retro-orbital blood samples obtained under isoflurane anesthesia, up to 8 hours post-dose. For the next 4 days, mice received daily (i.e. every  $24 \pm 2$  hours) combination therapy or mirdametininib monotherapy. On Day 5, another PK study was performed following combination or mirdametininib monotherapy, with one survival and terminal blood sample acquired per mouse.

Paxalisib PK was also assessed in a similar combination PK DDI study with another targeted anti-cancer agent DrugX (Study 2). On Day 1, paxalisib single agent PK was studied. Then for the next 4 days, mice received daily combination therapy with DrugX or paxalisib monotherapy, with combination or single agent PK evaluated on Day 5, respectively.

For survival samples, blood from the retro-orbital plexus, 50 -100  $\mu$ L, was collected into Sarstedt Minivette POCT KEDTA capillary devices. Plasma was immediately isolated and placed on dry ice until transfer to -80 °C for storage. At the terminal time points, blood was collected via cardiac puncture into a Sarstedt Microvette 500 KEDTA microtube, mice were perfused with PBS, and the brains extracted. All plasma and brain samples were stored on dry ice and transferred to -80 °C at the end of study. An outline of the studies and groups are presented in Supplementary Data 5a.

### **Bioanalysis**

Plasma and brain homogenate (Dilution Factor = 6, with ultrapure water) were subjected to deproteinization and analyzed for mirdametininib and paxalisib concentrations using a qualified LC-MS/MS assay with loperamide as the internal standard. Stock and spiking solutions were prepared in methanol and used to spike matrix calibrators and quality controls. Matrix samples, 25  $\mu$ L each, plus 25  $\mu$ L of IS (5 ng/mL in methanol) were protein precipitated with 100  $\mu$ L of acetonitrile. A 5  $\mu$ L aliquot of the supernatant was injected onto a Shimadzu LC-20ADXR high performance liquid chromatography system via a Shimadzu SIL-20AC XR autosampler. The LC separation was performed using a Phenomenex Kinetex C18 (2.6  $\mu$ m, 50 mm x 2.1 mm) column at 40°C with gradient elution at a flow rate of 0.25 mL/min. The binary mobile phase consisted of 0.2% formic acid in methanol: water (10:90, v/v) in reservoir A and 0.2% formic acid in methanol in reservoir B. The initial mobile phase composition was maintained at 10% B for 0.5 minutes and was followed by a linear increase to 100% B in 2.5 minutes. The column was then rinsed for 1 minute at 100% B and then equilibrated at the initial conditions for 2 minutes for a total run time of 6 minutes. Under these conditions, mirdametininib eluded at 3.31 minutes, paxalisib at 3.00 minutes, and IS at 3.16 minutes. Analytes and IS were detected with tandem mass spectrometry using a SCIEX API 4000 in the positive ESI mode with the following mass were transitions monitored: mirdametininib 482.90 -> 249.00, paxalisib 383.30 -> 353.20, and loperamide 477.30 -> 266.10.



The method qualification and bioanalytical runs all passed acceptance criteria for non-GLP assay performance. A linear model ( $1/X^2$  weighting) fit the calibrators across the 1 to 100 ng/mL range, with a correlation coefficient (R) of  $\geq 0.9959$ . Sample dilution integrity was confirmed. The lower limit of quantitation (LLOQ), defined as a peak area signal-to-noise ratio of 5 or greater versus a matrix blank with IS, was 1 ng/mL for plasma and 6 ng/mL for brain homogenate secondary to the dilution. The intra-run precision and accuracy was  $\leq 7.36\%$  CV and 88.2% to 113%, respectively.

### **Pharmacokinetic (PK) Analysis**

Summary statistics for mirdametininib and paxalisib concentration-time (Ct) data in plasma and brain were generated by study, occasion (Day 1 vs. Day 5), combination status, and nominal time point and presented in tabular form, along with Mean (SD) Ct profile figures, using Phoenix WinNonlin 8.1 (Certara USA, Inc., Princeton, NJ).

Plasma Ct data for mirdametininib and paxalisib were grouped by study, analyte, individual mouse, occasion, and combination status and analyzed using nonlinear mixed effect (NLME) modeling implemented in Monolix 2019R2 (Lixoft SAS, Antony, France).

Parameters and the Fisher Information Matrix (FIM) were estimated using the stochastic approximation expectation maximization (SAEM) algorithm, and the final log-likelihood estimated with importance sampling, all using the default Monolix initial settings. A variety of models were fit to the Ct data, parameterized using apparent clearances or rate constants, volumes of distribution, and absorption rates as needed. These models were assessed for goodness of fit using the -2 log likelihood (-2LL) value, Akaike and Bayesian Information Criterion (AIC, BIC), visual predictive checks, plots of model individual and population predicted vs. observed data, residual plots, and the standard errors of parameter estimates. A log-normal inter-individual ( $\omega$ ) and inter-occasion ( $\gamma$ ) distribution was assumed on selected supported parameters, with only diagonal elements of parameter covariance matrices estimated. Additive and/or proportional residual error

models were tested and implemented as supported. Beal's M3 method was used to handle any data that were below the LLOQ<sup>1</sup>.

The compound combinations were tested as categorical covariates upon the mirdametininb or paxalisib supported PK parameters, primarily the apparent oral clearance (CL/F). The covariate effect was considered statistically significant if its addition reduced the -2LL by at least 3.84 units ( $P < 0.05$ , based on the  $\chi^2$  test for the difference in the -2LL between two hierarchical models that differ by 1 degree of freedom). Additionally, Wald test P values were outputted for the interaction covariate effect levels by the software, and reported in the Results tables. Secondary PK parameters such as the maximum concentration (C<sub>max</sub>), time of C<sub>max</sub> (T<sub>max</sub>), area under the Ct curve (AUC), and apparent terminal half-life (T<sub>1/2</sub>) were derived from the model parameter estimates using standard formulae for the relevant compartmental model<sup>2</sup>.

### **Mirdametininb Pharmacokinetics in Mice**

The plasma PK of mirdametininb was well-described using a linear, two-compartment model with zero-order absorption. Absorption was rapid, with the T<sub>max</sub> generally occurring at the 0.25 hr time point. As there was no observable data in the absorption phase, the zero-order absorption rate (T<sub>k0</sub>) was fixed to 0.125 hr. The plasma Ct profile showed a distribution phase lasting approximately 1 hr, followed by an apparent terminal phase with a half-life of ~ 4 hrs. No accumulation occurred with daily dosing for 5 days in mice. Apparent oral clearance (CL/F) was low at 12.9 mL/min/kg or ~14% of hepatic blood flow. The apparent volume of distribution was large and greater than total body water. The bioavailability of mirdametininb was not evaluated in this study, but has previously been reported to be ~30% in rats (data not shown).

A linear two-compartment model with inter-individual and inter-occasion variability on both apparent oral clearance (CL/F) and apparent oral volume of distribution (V<sub>c</sub>/F), and proportional residual error best described the overall plasma Ct data. The precision of the

variability estimates was poor likely due to model overparameterization and the small number of mice and samples available; however, the goodness of fit plots and post hoc individual visual predictive checks indicated adequate performance. Combination status was tested as a covariate on CL/F and Vc/F inter-occasion variability, and its addition on both parameters improved the model fit (-2LL P=0.0003714858), indicating a statistically significant effect of paxalisib co-administration on mirdametininib plasma PK.

There was a 23.1% reduction in mirdametininib CL/F with combination therapy (P=0.0124957), and a 61.9% decrease in Vc/F (P=0.000159031). This resulted in a 2.63-fold higher C<sub>max</sub>, but only a 1.30-fold increase in AUC. Therefore, no practical effect of paxalisib upon mirdametininib PK by the predefined  $\geq 2$ -fold difference of AUC or CL/F criteria was observed. This lack of a practical effect is supported by comparison of C<sub>t</sub> plots. The parameter estimates from the full mirdametininib model are presented in Supplementary Data 5b with the model predicted median, 90% prediction interval, and observed plasma mirdametininib concentrations presented in Supplementary Fig. 10a.

### **Paxalisib Pharmacokinetics in Mice**

The plasma PK of paxalisib was well-described using a linear, one-compartment model with first-order absorption. Absorption rate was moderate and showed low-to-moderate variability, with the T<sub>max</sub> occurring at 1-2 hrs post-dose. The absorption rate appeared slower on Day 5 in combination vs. Day 1. The plasma C<sub>t</sub> profile appeared monophasic, showing a terminal phase half-life ranging from 4.47 hrs alone to 7.28 hrs with mirdametininib. Significant accumulation occurred with daily dosing for 5 days in mice. Apparent oral clearance (CL/F) was low-to-moderate at 19.3 mL/min/kg or  $\sim 21.5\%$  of hepatic blood flow. The apparent volume of distribution was large and greater than total body water. The bioavailability of paxalisib was not evaluated in this study, but has been reported to be high in various preclinical species.

A linear one-compartment model with inter-individual variability on first-order absorption rate ( $k_a$ ), apparent oral clearance (CL/F), apparent oral volume of distribution ( $V_c/F$ ), and inter-occasion variability on apparent oral clearance (CL/F), and proportional residual error best described the overall plasma  $C_t$  data. The precision of some variability estimates was poor likely due to model overparameterization; however, the goodness of fit plots and post hoc individual visual predictive checks indicated adequate performance.

Combination status was tested as a covariate on CL/F inter-occasion variability, and its addition significantly improved the model fit (-2LL  $P=0.0005042182$ ), suggesting a statistically significant effect of either mirdametininib and/or DrugX co-administration or study day on paxalisib plasma PK.

There was a 38.6% reduction in paxalisib CL/F in combination with mirdametininib on Day 5 ( $P=0.000218137$ ), resulting in a statistically significant 1.63-fold increase in paxalisib AUC. This failed to meet the  $\geq 2$ -fold difference of AUC or CL/F criteria, and therefore we conclude that there is no practical effect of mirdametininib upon paxalisib PK. This is also supported visually by comparison of  $C_t$  plots. The parameter estimates from the full paxalisib model are presented in Supplementary Data 5c with the model predicted median, 90% prediction interval, and observed plasma paxalisib concentrations presented in Supplementary Fig. 10b.

### **Pharmacokinetic summary**

The plasma PK of mirdametininib 14 mg/kg PO in mice is similar to that previously reported with respect to the  $C_t$  curve shape. However, the AUC increased less than proportionally compared with clinically relevant doses of 0.5 and 1.5 mg/kg PO<sup>3</sup>, suggesting saturable absorption, lower bioavailability, or higher clearance in our mice at the 14 mg/kg dose. Mirdametininib plasma PK after multiple doses appeared similar (Day 1 vs Day 5), suggesting it has time-invariant PK in mice. While a higher mirdametininib plasma  $C_{max}$  was observed

in combination, the AUCs were not practically different (1.30-fold) – as this failed to meet the  $\geq 2$ -fold criteria, paxalisib has no practical effect upon mirdametininib PK in mice. The brain penetration of mirdametininib appeared similar alone and in combination on Day 5 ( $K_{p,last}$  0.502 and 0.524, respectively), and similar to published data in mice<sup>4</sup>. The plasma PK of paxalisib 8 and 10 mg/kg PO in mice, after a single dose on Day 1, is similar to that reported at 25 mg/kg, assuming dose proportional PK<sup>5</sup>.

The brain penetration of paxalisib on Day 5 in combination ( $K_{p,last} = 1.42$ ) was similar to that reported previously (single dose  $K_{p,6hr} = 1.39$ )<sup>5</sup>. There was no difference in paxalisib brain concentration either alone or in combination with mirdametininib or DrugX. Paxalisib's plasma AUC was 1.63-fold higher than expected in combination with mirdametininib. While this difference was statistically significant, indicating a possible weak drug interaction, it failed to meet the  $\geq 2$ -fold criteria for a practical interaction. Therefore mirdametininib had no practical effect on the PK properties of paxalisib.

Mirdametininib and paxalisib total plasma AUCs at these dose levels in mice exceed those observed clinically in humans. A PK-guided clinically relevant dose for mirdametininib, equivalent to 4 mg PO BID in humans<sup>6</sup>, would be 0.5 mg/kg PO BID in mice. Likewise for paxalisib, a PK-guided dose similar to 45 mg PO QD in humans<sup>7</sup> would be approximately 2 mg/kg to 4.5 mg/kg PO QD in mice.

## References for Supplementary Note 1

- 1 Beal, S. L. Ways to fit a PK model with some data below the quantification limit. *J Pharmacokinetic Pharmacodyn* **28**, 481-504, doi:10.1023/a:1012299115260 (2001).
- 2 Gibaldi, M. & Perrier, D. *Pharmacokinetics, Second Edition*. (CRC Press, 1982).
- 3 Jousma, E. *et al.* Preclinical assessments of the MEK inhibitor PD-0325901 in a mouse model of Neurofibromatosis type 1. *Pediatr Blood Cancer* **62**, 1709-1716, doi:10.1002/pbc.25546 (2015).
- 4 de Gooijer, M. C. *et al.* The impact of P-glycoprotein and breast cancer resistance protein on the brain pharmacokinetics and pharmacodynamics of a panel of MEK inhibitors. *International journal of cancer* **142**, 381-391, doi:10.1002/ijc.31052 (2018).
- 5 Salphati, L. *et al.* Brain Distribution and Efficacy of the Brain Penetrant PI3K Inhibitor GDC-0084 in Orthotopic Mouse Models of Human Glioblastoma. *Drug metabolism and disposition: the biological fate of chemicals* **44**, 1881-1889, doi:10.1124/dmd.116.071423 (2016).
- 6 LoRusso, P. M. *et al.* Phase I pharmacokinetic and pharmacodynamic study of the oral MAPK/ERK kinase inhibitor PD-0325901 in patients with advanced cancers. *Clinical cancer research : an official journal of the American Association for Cancer Research* **16**, 1924-1937, doi:10.1158/1078-0432.CCR-09-1883 (2010).
- 7 Wen, P. Y. *et al.* A first-in-human phase 1 study to evaluate the brain-penetrant PI3K/mTOR inhibitor GDC-0084 in patients with progressive or recurrent high-grade glioma. *Journal of Clinical Oncology* **34**, 2012-2012, doi:10.1200/JCO.2016.34.15\_suppl.2012 (2016).
